# Supplementary material for: Recurrent somatic BRAF insertion (p.V504_R506dup): a tumor marker and a potential therapeutic target in pilocytic astrocytoma
Source: PubMed Central journal article supplement (PMC6484687; doi:10.1038/s41388-018-0623-3), 2018-12-21
Supplement: 41388_2018_623_MOESM2_ESM.pdf [file 41388_2018_623_MOESM2_ESM.pdf]

| <b>p</b>           | <b>Nb of cases</b> | <b>Description</b>                        |
|--------------------|--------------------|-------------------------------------------|
| <b>TCGA-LGG-US</b> | 516                | Lower Grade Glioma cases examined         |
|                    | 276                | Brain Glioblastoma Multiforme-TCGA, US    |
|                    | 499                | Pediatric Brain Cancer - DE               |
| <b>ICGC</b>        | 283                | Brain Lower Grade Glioma - TCGA, US       |
|                    | 186                | Pediatric Brain Tumor - Multiple subtypes |
|                    | 112                | Pediatric Medulloblastoma - CA            |
|                    | 28                 | Pilocytic Astrocytoma                     |
|                    | 212                | Astrocytoma                               |
| <b>GENIE AACR</b>  | 215                | Anaplastic Astrocytoma                    |
|                    | 379                | Glioblastoma                              |
|                    | 799                | Glioblastoma Multiforme                   |
|                    | 33                 | Low-Grade Glioma, NOS                     |
| <b>TARGET</b>      | 222                | Neuroblastome                             |
