# Supplementary material for: Recurrent somatic BRAF insertion (p.V504_R506dup): a tumor marker and a potential therapeutic target in pilocytic astrocytoma
Source: PubMed Central journal article supplement (PMC6484687; doi:10.1038/s41388-018-0623-3), 2018-12-21
Supplement: 41388_2018_623_MOESM4_ESM.pdf [file 41388_2018_623_MOESM4_ESM.pdf]

**Table S3. Somatic mutation found by WES of tumoral material of the TC0011. Mutations were validated by Sanger and ultra-deep sequencing**

| Chr   | Start     | End       | Ref | Alt       | DP  | Func.refgene | Gene.refgene     | ExonicFunc. | SOMATIC |
|-------|-----------|-----------|-----|-----------|-----|--------------|------------------|-------------|---------|
| chr12 | 113531016 | 113531016 | C   | G         | 353 | exonic       | DTX1             | nonsynonym  | yes     |
| chr2  | 223086090 | 223086090 | C   | T         | 308 | exonic       | PAX3             | nonsynonym  | yes     |
| chr7  | 140477790 | 140477790 | -   | CTGAGTACT | 52  | splicing     | BRAF(NM_004333:e | NA          | yes     |
