# Supplementary material for: Recurrent somatic BRAF insertion (p.V504_R506dup): a tumor marker and a potential therapeutic target in pilocytic astrocytoma
Source: PubMed Central journal article supplement (PMC6484687; doi:10.1038/s41388-018-0623-3), 2018-12-21
Supplement: 41388_2018_623_MOESM7_ESM.pdf [file 41388_2018_623_MOESM7_ESM.pdf]

| Index | Specimen Label | Clinical Site # | Case # | DOB (mm/dd/yyyy) | Sex  | Ethnicity (Race) | Clinical Diagnosis | Date of procurement | Anatomical Site            | Tumor Location | Tissue Specification | Specimen Matrix | Specimen Format | Container | Number of containers | Amount per container | Unit | Type of Procurement | Histological description (Source) | Grade (source) | TNM Stage (T) | TNM Stage (N) | TNM Stage (M) | Treatment type | Component of treatment (Chemo / Horm Th Details) | Tumor cell % |
|-------|----------------|-----------------|--------|------------------|------|------------------|--------------------|---------------------|----------------------------|----------------|----------------------|-----------------|-----------------|-----------|----------------------|----------------------|------|---------------------|-----------------------------------|----------------|---------------|---------------|---------------|----------------|--------------------------------------------------|--------------|
|       |                |                 |        |                  | male | caucasian        | Astrocytoma        |                     | Brain, right temporal lobe | Primary        | Tumor                | Tissue          | OCT             | block     | 1                    | 200                  | mg   | surgery             | Diffuse astrocytoma               | 2              | n/a           | n/a           | n/a           | none           | n/a                                              | 80           |
|       |                |                 |        |                  | male | caucasian        | Astrocytoma        |                     | Blood                      | n/a            | Normal               | Blood           | frozen          | tube      | 1                    | 4                    | ml   | blood draw          | n/a                               | n/a            | n/a           | n/a           | none          | n/a            | n/a                                              |              |

ICD-O-3  
Astrocytoma, diffuse  
G400/3  
Site: (R) Brain, Supratentorial  
C71.0  
GJ 4/2/13

UUID:13BDC5C7-92EB-4FCD-ACAB-8005C2F099D4  
TCGA-P5-A5EY-01A-PR Redacted

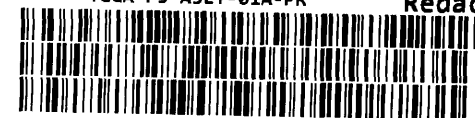

| Criteria                       | Yes                                                                                         | No                                  |
|--------------------------------|---------------------------------------------------------------------------------------------|-------------------------------------|
| Transcript Discrepancy         |                                                                                             | <input checked="" type="checkbox"/> |
| Primary Tumor Site Discrepancy |                                                                                             | <input checked="" type="checkbox"/> |
| RNA Discrepancy                |                                                                                             | <input checked="" type="checkbox"/> |
| Prior Pathology History        |                                                                                             | <input checked="" type="checkbox"/> |
| Concurrent/Synchronous Primary |                                                                                             | <input checked="" type="checkbox"/> |
| Case is (circle):              | <input checked="" type="checkbox"/> <u>EXCLUDED</u> / <input type="checkbox"/> DISQUALIFIED |                                     |
| Reviewer Initials:             | GTH Date Reviewed: 2/19/12                                                                  |                                     |
